# Supplementary material
Source: publisher site journal article supplement (https://static.cambridge.org/content/id/urn:cambridge.org:id:article:S0714980823000107/resource/name/S0714980823000107supp001.docx)
Supplement: Supplementary file 1 [file S0714980823000107supp001.docx]

**Supplemental Material**

**Selection of Older People Subtypes**

**Table 1**

*Older People Subtypes, Labels and Associated Set of Characteristics from Participants, and Labels from Judges (French-Language Document)*

| Participant | Label | Set of Characteristics | Label from Judges (after Consensual Choice) |
| --- | --- | --- | --- |
| 1 | Dépendante | Vit en foyer, peu autonome, passive | Maison de retraite |
|  | Active | Indépendante, autonome | Actif |
|  | Malade | Troubles divers | Malade |
| 2 | Démente | Désinhibée, motricité limité, perte de mémoire, pb pour dialoguer, bruyante, agressive, infernale, pb de santé, hospitalisée | Sénile |
|  | Retraite active | Déplacements laborieux, se prépare à manger, autonome, soins infirmiers, sympathique, calme, agréable, active, accueillante, s'occupe au quotidien | Retraité actif |
|  | Handicapée | Difficile à gérer, agréable, affectueuse, joviale, activité altérée | Handicapé |
|  | En prison | Tristesse, lassée | En prison |
|  | Sociable | Motivé, généreux, militant, ouvert aux autre et au monde, bien être, équilibré | Ouvert aux autres |
| 3 | Ouvert aux autres | Dynamique, autonome, plein de vie, attentionnée, sociable, en association | Ouvert aux autres |
|  | Sénile | Perdu, incompris, pénible, bruyant, demande beaucoup d’attention, dépendante | Sénile |
|  | Grands parents | Gentille, attentionnée, généreux, gâteux, sociable, drôle, énergique, bon cuisinier, a de bons conseils, raconte des anecdotes et des histoires | Grands-parents |
|  | Handicapées | Accident, AVC, douleur, demande des soins de l’attention et du temps, seule, besoin de compagnie, besoin de parler | Handicapé |
| 4 | Conviviales | Chaleureuses, ouvertes, bienveillantes, transmettent le savoir, modestes, sages | Ouvert aux autres |
|  | Aigries | méprisantes, fermées d’esprit, pénibles | Aigri |
| 5 | Retraitées | Temps libre, activités, indépendantes | Retraité actif |
|  | Actifs | Travaillent encore, indépendants | Travailleur âgé |
|  | En institution | Troubles moteurs et cognitifs, dépendantes, sédentaires | En institution |
| 6 | Ronchon | Renfermé, aigri, asocial, râleur | Aigri |
|  | Gâteux | Généreux, surprotecteurs, parle aux enfants de manière simpliste | Gâteux |
|  | Seul | Allongé, chez lui, télévision | Reclus |
|  | Retraité actif | Voyage, travaille bénévole, cuisine, jardine, se ballade, passe du temps en famille | Retraité actif |
| 7 | Retraite | se maintient en forme, bonne santé physique et mentale, travaille éventuellement, voyage, autonome, actif | Retraité actif |
|  | Malade | Hospitalisé, soin à domicile, besoin d’aide, peu autonome, dépressive, s’ennuie. | Malade |
| 8 | Optimistes | Entourées de proches, intéressées, paisibles, sereines, très famille | Optimiste |
|  | Déprimées | Déprimées par la vieillesse et l’approche de la mort, seules, pessimistes, perdues, abandonnées (maison de retraite) | Déprimé |
|  | Autonomes | Dynamiques, débrouillardes, énergiques, vivent chez eux | Autonome |
|  | Malades | Pas autonomes, besoin d’être prises en charge, ne peuvent plus vivre seules, Alzheimer. | Malade |
| 9 | Actif | Motivé, beaucoup d’activité, fait du sport, s’occupe de soi, participe à la vie de famille, indépendant | Retraité actif |
|  | Maison de retraite | ne bouge pas beaucoup, peu ou plus d’activité, monotonie, besoin d’aide | Maison de retraite |
| 10 | Retraité | A domicile, entretient de l’habitation, garde des enfants, bénévole, hobbies, rencontres, indépendant | Retraité actif |
|  | Handicapée | aide à domicile, peu ou pas actif, isolement | Handicapé |
| 11 | Active | Sportif, entouré, sains | Actif |
|  | Seule | Isolée, solitude, tristesse, veuves, recluse | Reclus |
|  | Malade | Alzheimer, fatiguée, problèmes physiques, mites motrices, médicalisation | Malade |
|  | Retraité | Vacances, loisirs, s’occupe des petits enfants | Retraité actif |
|  | Encore en exercice | Passion pour le métier, pb financiers | Travailleur âgé |
|  | Refus de vieillir | Chirurgie esthétique, couguar, look jeune | Cougar |
| 12 | Politicien | Indépendantes, maire, impliqué dans la vie publique, corrompu | Politicien âgé |
|  | En maison de retraite | Dépendantes, incontinentes, dépressives | Maison de retraite |
|  | Retraités actifs | Sportif, dynamiques, activités variées, s’intéressent à l’actualité, impliquées, voyagent, refus de vieillir | Retraité actif |
|  | Malades | Démences, Alzheimer, institution, besoin de soins, soucis physiques | Malade |
| 13 | Retraitées | Activités « typique » (jardinage, cuisine, tricot, couture), vie paisible, amis du même âge, attachés à la vie de famille | Retraité actif |
|  | Attaché aux traditions | Défend ses valeurs, cultivé, professeur | Traditionnel |
|  | A la rue | Seul, sale, triste | SDF |
| 14 | Maison de retraite | Maison de retraite, dépendantes | Maison de retraite |
|  | Handicapée | Bénéficient d’aide, vivent chez eux | Handicapé |
|  | Indépendantes | Autonomes, se débrouillent seules | Indépendantes |
|  | Sénile | Assisté, maison de retraite, seule, retiré, lent | Sénile |
| 15 | Dynamique | Dynamique, sociable, participe à la vie de famille, énergique | Dynamique |
|  | Sénile | Alzheimer, difficile à vivre, assistée | Sénile |
| 16 | Retraités | Autonome, bonne santé, actif | Retraité actif |
|  | Maison de retraite | Perte de capacité, humeur variable, perte de mémoire, malade | Maison de retraite |
|  | Alcoolique | SDF, sale, agressif, seul | SDF |
|  | Vieux croyant | Religieux, croyant, prêtre | Croyant |
|  | Malades | Alzheimer, fragile, perte d’autonomie, besoin d’être entourée | Malade |
| 17 | Retraités | 65-75 ans, actifs, aidants, voyages | Retraité actif |
|  | 4eme âge | 75-90 ans, baisse d’activité (physique et mentale), rattrapés par les difficultés, moins insérés socialement, moins grand réseau social | Quatrième âge |
|  | 5eme âge | 90-100 ans, altération physique et mentale avancée, dépendantes, prise en charge | 5eme âge |
| 18 | Maison de retraite | Seuls, s’ennuie, assistés, dépendants | Maison de retraite |
|  | Traditionnel | Démodé, nostalgique, tradition | Traditionnel |
| 19 | Gâteux | Protecteur, agréable, généreux | Gâteux |
|  | Jeune retraité | Actif, spontané, profite de la vie, indépendant | Retraité actif |
|  | Octogénaire | Lent, affaibli, perd la raison | Octogénaire |
| 20 | Maison de retraite | Lents, malades, dépendants, besoin de soins | Malade |
|  | SDF | Possède un animal, affamé, proche de la mort, vie dehors, seul | SDF |
|  | Retraités | Energiques, tranquilles, libres, riches, voyagent, attentifs, présents pour leur famille | Retraité actif |
| 21 | Seniors | 60 ans, encore actifs, grands-parents, épanouis | Senior |
|  | Nostalgique | Vit dans le passé, radote, aime la tradition, n’aime pas les jeunes | Traditionnel |
|  | Malades | De plus en plus dépendants, signes de vieillesse, maladies commencent | Malade |
|  | Séniles | Plus de 85 ans, changement de personnalité, fragilité, perte de mémoire, démence, pensent au passé tout le temps, fatiguées, diminution physique, dépendantes. | Sénile |
|  | Sans domicile | SDF, alcoolique, dépérit | SDF |
| 22 | Jeunes retraités | Actifs, voyagent, découvrent de nouvelles choses, passent du temps avec les enfants et les petits enfants, sport, éveillés, ont des activités | Retraité actif |
|  | Depuis longtemps à la retraite | Ont gout à la vie, moins d’activités, s’intéressent encore à ce qui se passe dans le monde. | Depuis longtemps à la retraite |
|  | Déprimée | Démence, tristes, déprimée, idées noires, ont l’impression d’embêter leurs enfants. | Déprimé |
| 23 | Retraite active | Souriants, intelligents, activités diverses | Retraité actif |
|  | Grands parents | A l’écoute, confidentes, gâtent et s’occupent des petits enfants, donnent des conseils, indépendantes, font des jeux, cuisinent | Grands-parents |
| 24 | Sages | Dynamiques, gentilles, sages, têtues | Sage |
|  | Fatiguées | fatiguées, attachantes, posées, écoutées | Fatigué |
|  | Grabataires | séniles, infantiles, 90 ans et plus | Sénile |
| 25 | Mamie gâteau | Attentionnée, joyeuse, active, cuisinière, gentille | Grands-parents |
|  | Grincheux | Irascible, ronchon, ne veulent pas d’aide, solitaire, indépendant, agressif | Aigri |
|  | Elégante | Apprêtées, prennent soin de leur apparence, maquillées, coiffées | Elégant |
|  | « A la rue » | SDF, pauvre, vie dans la rue, triste | SDF |
|  | Malades | Maison de retraite, assistées, dépendantes | Malade |
| 26 | Retraite active | Agréable, vive, chaleureuse, joyeuse, généreuse, souriante | Retraité actif |
|  | Aigrie | Aigrie, râleuse, frustrée, radote, se plaint tout le temps, n’aime pas les autres | Aigri |
|  | Inactive | Triste, passive, radote, pensive, nostalgique | Inactif |
|  | Malade | Triste, déprimée, passive, baisse les bras facilement | Déprimé |
| 27 | Retraités actifs | Vivent seuls, conduisent, indépendants, lisent, s’informent | Retraité actif |
|  | Mamie gâteau | S’occupe, se promène, jardinage, cuisine, s’occupe des petits enfants, indépendants | Grands-parents |
|  | Sportifs | Actifs, font du sport | Sportif |
|  | Dépendants | Plus autonome, besoin d’aide, inactifs | Dépendant |
|  | Aigris | Peu entourés, peu de lien avec la famille, râleurs | Aigri |
| 28 | En institution | Dépendante, malades, altérée (physiquement et mentalement), lentes, très vieilles | En institution |
|  | Début de retraite | Physiquement actif, plein d’entrain, engagé, joyeux, dynamique, motivé, énergique | Retraité actif |
|  | Diminué | Encore indépendante, lentes, sédentaires, calmes, posés, inactives | Diminué |
| 29 | Active | Bien entretenu, profite de leur retraite | Retraité actif |
|  | Non active | Oisive, légume | Inactif |
|  | Mesquines | Méchante, râleuse, hautaine | Aigri |
|  | Sympathique | Gentil, agréable, ouverte | Ouvert aux autres |
|  | Seule | abandonnée | abandonné |
|  | Sociable | Famille, activité de groupe, ouvert à son entourage | Ouvert aux autres |
| 30 | Retraité | Temps libre, souriants, aimants, bricoleur, lent, fun | Retraité actif |
|  | Senior en activité | Stressé, actif, mince, dynamique | Travailleur âgé |
|  | Sénile | Agressif, tête en l’air, dément | Sénile |
|  | Grand parents | Aimant, gentil, ont du temps à te consacrer | Grands parents |
| 31 | Actives | Energique, souriant, envie de vivre, joie, pas besoin d’aide externe | Retraité actif |
|  | Déprimé | Etourdi, perdu, déprimé | Déprimé |
|  | Soins continus | En fin de vie, assujetti, perte de joie de vivre | En fin de vie |
|  | Vivant seul | Sort encore, s’occupe, assez indépendant | Vivant seul |
|  | Maison de retraite | Ennuyé, peu active, infantilisé | Maison de retraite |
| 32 | Indépendante | En bonne santé, autonome | Indépendant |
|  | Active | Activités complémentaires, retraitée, pêche, gentille | Retraité actif |
|  | Passives | Retraitée, sans activité, molle | Passif |
|  | Sagesse | Gandhi, Mandela, mentor, exemple | Sage |
|  | Hautaine | Méchante, morose, sale caractère | Aigri |
|  | Gentille | Aime les gens, drôle | Gentil |
| 33 | Retraité | Intéressé, aime lire, calme, activité diverses | Retraité actif |
|  | Grand parent | Sage, chaleureux, sens de l’humour, sensible, aimant | Grands-parents |
|  | Célibataire | Seul, actif, mobile, cynique, triste | Célibataire |
|  | Politicien | Cumul les mandats, malhonnête, riche, voleur, pouvoir | Politicien âgé |
| 34 | Troisième âge | Autonome, relativement active | Troisième âge |
|  | Quatrième âge | Très âgée, peu valide, en fin de vie | Quatrième âge |
|  | Senior moderne | Toujours en mouvement, libre, amoureux de la vie | Senior moderne |
|  | Senior ancien | Attentif à sa famille, bons grands parents, ne s’accorde pas de liberté individuelle, | Senior ancien |
|  | Seul | Souffre de solitude, ne cherche pas à sortir, vit dans un univers rétrécis | Reclus |
|  | Active | En bonne santé physique et intellectuelle | Actif |
|  | Vieux député | Assemblé national, grabataire, politicien | Politicien âgé |
|  | Passive | Mauvaise santé intellectuelle et physique | Passive |
|  | Hors du monde | N’a plus sa place en société, maison de retraite. | Hors du monde |
| 35 | Grand-mère « gâteau » | Joyeuse, s’occupe des petits enfants, maternelle | Grands-parents |
|  | Retraite active | Sportive, activité, indépendante, autonome | Retraité actif |
|  | Politicien | Politique, sénat, député | Politicien âgé |
|  | Malade | Démence, Alzheimer, dépendante, assistance médicalisée | Malade |
| 36 | Séniors | Loisirs, actions bénévoles, actif, encore sur le marché du travail. | Travailleur âgé |
|  | Grands-parents | Sportif, associations, sorties culturelles, voyages, s’occupe de la famille (petits enfants) | Grands-parents |
|  | Handicapée | Besoin des autres, manque d’autonomie | Handicapé |
|  | Retraités | Ont des activités | Retraité actif |
|  | Guide | Exemple pour les autres, sage, respecté | Sage |
| 37 | Séniors | Actifs, aiment voyager, sportifs, dynamiques, actifs, indépendants | Retraité actif |
|  | Retraités | Autonomes, voyage, joviale, aimant, généreux | Retraité actif |
|  | Handicapé | Invalide, besoin d’aide, dépendant | Handicapé |
| 38 | En fin de vie | Anxieux, dépendant, avare, égoïste | En fin de vie |
|  | Vieillissante | Engagée, solidaire, joyeuse, active, indépendante | Vieillissante |
|  | Religieux | Croyant, pratiquant, va à l’église | Croyant |
|  | Sage | Posé, patient, intelligent, cultivé, mémoire du passé, bon conseillé | Sage |
| 39 | Retraitées | Libres, voyagent, activités, joyeuses, pleines de vie, détendues, lentes, tristes, solitaires, seules, nostalgique, précarité. | Retraité actif |
|  | Malades | Déficientes, dépendantes, perte de repères, incohérentes, régression | Malade |
|  | Grands parents | Esprit de famille, aimantes, sens du partage, tolérantes, nostalgiques | Grands-parents |
| 40 | Grands parents | Souriant, raconte des histoires, maternelle, agréable, protecteur | Grands-parents |
|  | seule | Isolée, aigri, égoïste, râleuse, solitaire, | Reclus |
|  | Maison de retraite | Sénile, joyeux, régression | Maison de retraite |
| 41 | Nostalgique | Bloquée dans une époque révolue, en conflit avec la société actuelle, agressif, méfiant, antipathique | Nostalgique |
|  | Vivant dans son temps | Adaptée aux changements de la société, | Vivant dans son temps |
|  | Vieux politique | Donne son avis, malhonnête, sénat | Politicien âgé |
|  | Refus de la vieillesse | Refuse de penser à la mort, s’adapte | Refuse de vieillir |
|  | Sage | Plein de vie, nostalgique, accepte la mort, raconte des histoires, maternelle, philosophe | Sage |
| 42 | Retraité | Activité, serviable, expérience de vie, bon vivant, opinion politique tranchée | Retraité actif |
|  | Fin de vie | Fébrile, à la merci de la société | Fin de vie |
|  | Croyant | Pratiquant, église, religieux | Croyant |
|  | Dépressif | Assistée, souffrante, Alzheimer, au bout du rouleau, déprimé | Déprimé |
| 43 | En institution | Seule, délaissée, infantilisée, aigrie, démunie, impuissante, se laisse dépérir | Abandonné |
|  | Active | Jeune retraité, sportives, épanouie, seconde vie, prend soin d’elle, indépendante | Retraité actif |
|  | Grand parents | Maternelle, petit enfants, peur de la mort. | Grands-parents |
|  | Sdf | Vit dans la rue ou en foyer, mauvaise hygiène, mauvaise santé, pas d’espoir, alcoolique | SDF |
| 44 | Valide | pas besoin d’aide | Valide |
|  | Invalide | Aide matérielle, béquilles, déambulateur, fauteuil roulant, canne, aide financière, aide humaine | Handicapé |
|  | Active | Encore en emploi, travail associatif | Travailleur âgé |
|  | Inactive | Retraité, maison de retraite | Maison de retraite |
|  | N’accepte pas de vieillir | Lifting, botox, chirurgie esthétique, habits provoquant | Cougar |
|  | Vieillissement pathologique | Déficiences mentales et physiques | Sénile |
|  | Isolée | Seule, contacts avec famille et amis coupés | Abandonné |
|  | Sociable | Entourée d’amis et de la famille | Ouvert aux autres |
| 45 | Ouvertes | Bougent, côtoient beaucoup de personnes, actives, dévouées, profitent de la vie. | Ouvert aux autres |
|  | Déprimée | Renfermée, ne sort pas, démotivée, laisser aller, peu active, égoïste | Déprimé |
|  | Malade | Dépendante, triste, veut mourir | Malade |
|  | Mamie poule | Protectrice, couveuse, gentille, dévouée, à l’écoute, active | Grands parents |
| 46 | Retraité actif | Activités diverses, moins âgés, rythme e vie actif, intéressé | Retraité actif |
|  | Malade | Très âgé, lenteur | Malade |
|  | Seule | Isolée, pas de contact | Seul |
|  | Inactif | Isolée, lent, peu intéressé par la nouveauté, ne fait rien dans la journée | Inactif |
| 47 | Abandonnée | Nostalgique, se sent isolée, triste, radote, besoin de leur entourage | Abandonné |
|  | Active | Epanouie, toujours en mouvement, vacances, occupée | Retraité actif |
|  | Malades | Inactives, tristes, pessimistes, malheureux | Malade |
|  | Retraité actif | Petits enfants, vacances, sorties, dynamiques, joyeuses | Retraité actif |
| 48 | Actives | Indépendantes, productives, autonomes, va bien, à la retraite | Retraité actif |
|  | Alitées | Dépendantes, plus d’autonomie, besoin d’aide, malade, besoin de soins | Malade |
|  | Dément (pathologie) | Pathologie, dépendant, Alzheimer, Parkinson | Dément |
|  | Sénile (vieillissement normal) | Dépendant, perte d’autonomie, problème de mémoire | Sénile |
| 49 | Retraité actif | Intérêt culturel, engagement associatif, bon vivant, énergique, profite de sa retraite, motivé, sociable | Retraité actif |
|  | Isolé | Solitaire, triste, regrets, démuni, rejeté, pauvre | Abandonné |
|  | Malade | Hospitalisé, dépendant | Malade |
|  | Senior actif | Travaille, inséré en société | Travailleur âgé |
|  | Riche | Intérêts culturels variés, soigné | Riche |
|  | Démodé | Résigné, intransigeant, fermé d’esprit, asocial, peut être jeune (50 ans) | Démodé |
|  | Sage | Stable, accompli, savoir, altruiste, intérêt familial | Sage |
| 50 | Ouverte d’esprit | Bonne santé, indépendante, autonome, vacances, cultivée | Ouverte d’esprit |
|  | Triste | déprimée, dépendante, enfermée, | Déprimé |
|  | En Ehpad | Seul, en fauteuil roulant, sourd, dépendant, prend des médicaments | Maison de retraite |
|  | Croyante | Attachée à la religion, très vieille, messe de noël, prie, n’aime pas les jeunes | Croyant |
| 51 | Sénile | 90 ans, dépendante, fragile, dépressive | Sénile |
|  | Malade | Alzheimer, dépendante, triste, fardeau, inactives | Malade |
|  | Dynamiques | Afférées, se croient tout permis, indépendantes, famille, débrouillardes | Dynamique |
|  | Déprimées | Déprimées, fragiles, fardeau | Déprimé |
| 52 | Malade | Alitée, faible, renfermée | Malade |
|  | Voyageur | Autonome, indépendant, voyage, libre | Voyageur |
|  | Handicapé | Besoin d’aide, besoin de la famille | Handicapé |
|  | Vieux politicien | Assemblée, riche | Politicien âgé |
| 53 | Ouvertes aux autres | Bonne santé, vivent à domicile, groupes sociaux, amis | Ouvert aux autres |
|  | Maison de retraite | Dépendante, peu mobile, peu d’activités | Maison de retraite |
|  | Malade | Vivent à domicile, pb de santé | Malade |
| 54 | Jeune retraité | Actif, indépendant | Retraité actif |
|  | Grand parents | Sympathiques, généreux, à l’écoute | Grands-parents |
|  | Maison retraite | Seuls, tristes, dépendants | Maison de retraite |
|  | Seniors actifs | Travaillent, dynamiques, autoritaires, surs d’eux | Travailleur âgé |
| 55 | Seniors actifs | Motivés, indépendants, sociables, travailleurs, bonne santé | Travailleur âgé |
|  | Retraités actifs | Actifs, voyageurs, indépendants, bonne santé | Retraité actif |
|  | Dépendants | Malades, dépendants, besoin d’aide | Malade |
|  | Maison de retraite | Isolés, dépendants, malades, besoin d’aide | Maison de retraite |
| 56 | Actifs | Dynamiques, sportifs, voyageurs, bonne santé, toujours dans le mouvement | Retraité actif |
|  | Handicapé | Réduits physiquement, fatigués, isolés | Handicapé |
|  | Conservateurs | Vieille école, râleurs envers jeunes et société, rudes, peu sympathiques, vieilles traditions, démodés | Conservateur |
|  | Religieux | Va à l’église, catho, croie en dieu | Croyant |
|  | Ouverts | Dans l’air du temps, adaptés à la société, sympathiques avec les jeunes | Ouvert aux autres |
| 57 | Autonomes | Indépendants, actifs, épanouis, s’occupent | Autonome |
|  | Dépendants | Besoin d’aide, malades | Malade |
|  | Isolés | Sans famille, s’ennuie, télévision | Reclus |
|  | Ouverts | Curieux, s’adaptent, intéressés | Ouvert aux autres |
|  | Fermés | Cloisonnés, butés, démodés, stricts, revêches | Reclus |
| 58 | Retraités actifs | Actifs, bonne santé, moins de 70 ans, autonomes | Retraité actif |
|  | Seules | Isolées, tristes, veufs-veuves | Reclus |
|  | Malade | Santé moyenne, plus de 70 ans | Malade |
|  | Radoteur | Attaché aux anciennes valeurs, enfermé dans les traditions, nostalgique, aime l’ancien monde | Traditionnel |
| 59 | Retraité | Profite du temps libre, plutôt actif, disponible, autonome, voyageur, sain | Retraité actif |
|  | Senior | Actif pour la société, autonome | Retraité actif |
|  | Malade | Perte autonomie, maison de retraite, dégradation physique | Malade |
|  | Sénile | Dégradation physique et mentale, non actif, dépendant | Sénile |
| 60 | Actifs | Dynamiques, travaillent, motivés | Travailleur âgé |
|  | Sages | Instruits, philosophes | Sage |
|  | Retraités | Voyageurs, patients, marrants, généreux, activités | Retraité actif |
| 61 | Malades | Dépendants, maison de retraite, inactives, seules | Malade |
|  | Indépendantes | Actives, bonne santé, entourées, motivées | Retraités actif |
| 62 | Dépendant | solitude, besoin de contact social, abandonné | Abandonné |
|  | Indépendante | A domicile, débrouillard, assume ses responsabilités, heureux, s’occupe de soi, motivée, forte | Indépendante |
|  | Malade | Dépendant, tristesse, découragement, souffrance, besoin d’assistance | Malade |
| 63 | Retraités | Matinal, reposé, actif | Retraité actif |
|  | Seuls | Plus de 80 ans, lents, aigris, racistes, | Isolé |
| 64 | Dépendantes | Seules, isolées, difficultés dans la vie quotidienne, maison de retraite, auxiliaire de vie, difficultés à se déplacer, pb de santé | Dépendante |
|  | Active | Engagées dans de nombreuses activités, bon état de santé, indépendante | Retraité actif |
|  | Grands-parents | Entouré par la famille, s’occupe des petits enfants, autonome | Grands-parents |
| 65 | Ouverte | Dynamique, loisirs, intérêt pour la nouveauté, sociable | Ouvert aux autres |
|  | Sédentaire | Ne voulant pas sortir, seul, triste, enfermé, cloitré | Reclus |
|  | Active | Autonome, active, joyeuse | Retraité actif |
|  | Malade | Besoin d’autrui, institutions, malade, triste, sans émotion | Malade |
| 66 | Jeune retraité | Actif, indépendant, dynamique, autonome, vit chez lui | Retraité actif |
|  | En maison de retraite | Totalement dépendant, problèmes de santé | Maison de retraite |
|  | Handicapée | Fauteuil roulant, lourd handicap | Handicapé |
|  | Gardien des traditions | Patriarche, très vieux, culture, vit dans un petit village, réfractaire au progrès | Traditionnel |
| 67 | Jeune retraité | Actif, pleins de projets | Retraité actif |
|  | Grands parents | Attentionnés | Grands-parents |
|  | Hospitalisée | Malade, dépendante, sans activité, très âgé, grognon | Malade |
| 68 | Râleurs | Méchants, n’aiment pas les jeunes | Aigries |
|  | Maison retraite | Dépendantes, se dégradent, tristes, seules, abandonnées | Abandonné |
|  | Ouvertes | Gentilles, idéales, chaleureuses, accueillantes, ouvertes, attentionnées, amicales | Ouvert aux autres |
| 69 | Malades | Fatiguée, dépendante, plus de 85 ans, besoin d’assistance | Malade |
|  | Travailleurs | Dynamiques, travaillent encore, fort sens du labeur, courageux | Travailleur âgé |
|  | Grands parents | Affectueux, jovial, cuisine | Grands-parents |
|  | Anciens combattants | Courageux, bavards, ont participé à la guerre | Ancien combattant |
|  | « Emmerdeurs » | Psychorigides, râleurs, vieux-jeu | Aigri |
| 70 | Retraité actif | Dynamique, sportif, avenant, joyeux, occupé, sociable, activités | Retraité actif |
|  | Retraité isolé | Ronchon, inactif, dépressif, passif, se plaint tout le temps, commère, radote | Abandonné |
|  | Ancien | Aime le passé, valeurs démodées, conservateur, cultivé, défend un mode de vie plus ancien | Traditionnel |
| 71 | Malades | Dépendants, pauvres, besoin d’être pris en charge, invalides, Alzheimer | Malade |
|  | Retraités actifs | Voyagent, indépendants, aisés, profiteurs | Retraité actif |
|  | Prêcheur | Religieux, catholique, convaincu, croit en dieu | Croyant |
| 72 | Actives | Bonne humeur, profite de la vie, partage des expériences, voyagent, temps libre | Retraité actif |
|  | Déprimées | Tristes, déprimées, sédentaires, solitude, arrogantes, méchantes | Déprimé |
|  | Déficientes | Institutions, se dégradent | Déficient |
|  | Démodé | Fait la fête, aime la culture, gardien des traditions, jovial, lecture, transmet, ‘old school’ | Traditionnel |
| 73 | Retraité | Loisir, promenade, lecture, méditative, voyage, malheureuse, télévision, jardin, animaux, petits enfants | Retraité actif |
|  | Malade | relations difficile avec la famille, maison de retraite, triste, découragée, violente, qui dérange | malade |
|  | Handicapée | Seule, besoin d’assistance, pb physiques, institutions, dépendante | Handicapé |
|  | Déficiente | Alzheimer, pb de mémoire, institutions, dépendante | Déficient |
|  | Active | Joyeuse, occupée, passionnée, sport, écoute les actualités, milieu associatif | Retraité actif |
| 74 | Solitaire | Veuf/veuve, seule, introvertie, naïve, avare | Reclus |
|  | Vieux politicien | Riche, travail dans la politique, extraverti, peu honnête, aime le pouvoir | Politicien âgé |
|  | Retraite active | Joyeuse, vivace, volontaire, extravertie, seule, sportive, dynamique | Retraité actif |
|  | Handicapée | Inactive, mélancolique, dépendante, diminuée | Handicapé |
| 75 | Clochard | Vit dans la rue, dégradé, en mauvaise santé | SDF |
|  | Maladif | Ne se déplace plus, en fin de vie, contagieux | Malade |
|  | Proche de la retraite | Travaille encore , peu productif, lassé, adopte un rythme lent | Travailleur âgé |
|  | Ronchon | Râle, mécontent, aigri, s’en prend aux plus jeunes | Aigri |
|  | Retraité | Prend du bon temps, profite de la retraite, voyage, actif, motivé, joyeux | Retraité actif |
|  | Bonne sœur | Croyantes, vit dans un couvent, aide les autres, généreuse | Croyant |
| 76 | Papy/mamie | Aime ses petits-enfants, actif, sympathique, généreux, attentif | Grands-parents |
|  | Conseil les autres | Ecouté, à l’écoute, sage, inspire les autres | Sage |
|  | Conservateur | Démodé, politicien, sénateur ou député, voleur | Politicien âgé |
| 77 | Religieux | Prière, messe, démodé, église | Croyant |
|  | Attaché aux traditions | Respectable, respect des traditions, transmet le savoir, cultivé | Traditionnel |
|  | Clochard | Vieux punk à chien, pauvre, sale, déprimé, fait la manche | SDF |
|  | Maladie | Perfusion, inactive, au lit, dépendante, proche de la fin | Malade |

**Table 2**

*Older People Subtypes (Organized after Consensual Choice from Judges) and their Number of Occurrences (French-Language Document)*

| Ranking | Stéréotype | Occurrences |
| --- | --- | --- |
| **1** | **Retraité actif (Active retiree)** | **54** |
| **2** | **Malade (Sick)** | **32** |
| **3** | **Grands-parents (Grandparent)** | **17** |
| **4** | **En maison de retraite (Living in retirement home)** | **14** |
| **5** | **Ouvert aux autres (Open to others)** | **13** |
| **6** | **Handicapé (Disabled)** | **12** |
| **7** | **Travailleur âgé (Older worker)** | **11** |
| **8** | **Sénile (Senile)** | **11** |
| **9** | **Aigri (Embittered)** | **10** |
| **10** | **Déprimé (Depressed)** | **9** |
| **11** | **Reclus (Recluse)** | **9** |
| **12** | **Abandonné (Abandoned)** | **8** |
| **13** | **Attaché aux valeurs traditionnelles (Attached to traditional values)** | **8** |
| **14** | **Croyant (Believer)** | **8** |
| **15** | **Sans domicile fixe (Homeless)** | **8** |
| **16** | **Politicien âgé (Older politician)** | **8** |
| **17** | **Sage (Wise)** | **8** |
| 18 | Actif | 3 |
| 19 | Inactif | 3 |
| 20 | En fin de vie | 3 |
| 21 | Indépendant | 3 |
| 22 | Sénior | 3 |
| 23 | En institution | 2 |
| 24 | Gâteux | 2 |
| 25 | Autonome | 2 |
| 26 | Cougar | 2 |
| 27 | Dynamique | 2 |
| 28 | Quatrième âge | 2 |
| 29 | En institution | 2 |
| 30 | Dépendant | 2 |
| 31 | Passif | 2 |
| 32 | En fin de vie | 2 |
| 33 | Déficient | 2 |
| 34 | En prison | 1 |
| 35 | Optimiste | 1 |
| 36 | Troisième âge | 1 |
| 37 | Cinquième âge | 1 |
| 38 | Octogénaire | 1 |
| 39 | Depuis longtemps à la retraite | 1 |
| 40 | Fatigué | 1 |
| 41 | Elégant | 1 |
| 42 | Sportif | 1 |
| 43 | Diminué | 1 |
| 44 | Vivant seul | 1 |
| 45 | Gentil | 1 |
| 46 | Célibataire | 1 |
| 47 | Hors du monde | 1 |
| 48 | Vieillissant | 1 |
| 49 | Nostalgique | 1 |
| 50 | Vivant dans son temps | 1 |
| 51 | Refuse de vieillir | 1 |
| 52 | Valide | 1 |
| 53 | Riche | 1 |
| 54 | Démodé | 1 |
| 55 | Ouvert d’esprit | 1 |
| 56 | Voyageur | 1 |
| 57 | Conservateur | 1 |
| 58 | Isolé | 1 |

*Note:* Selected Subtypes are in bold and translated into English

**Two-step cluster analysis**

1. **Including all groups**
2. **Hierarchical cluster analyses**


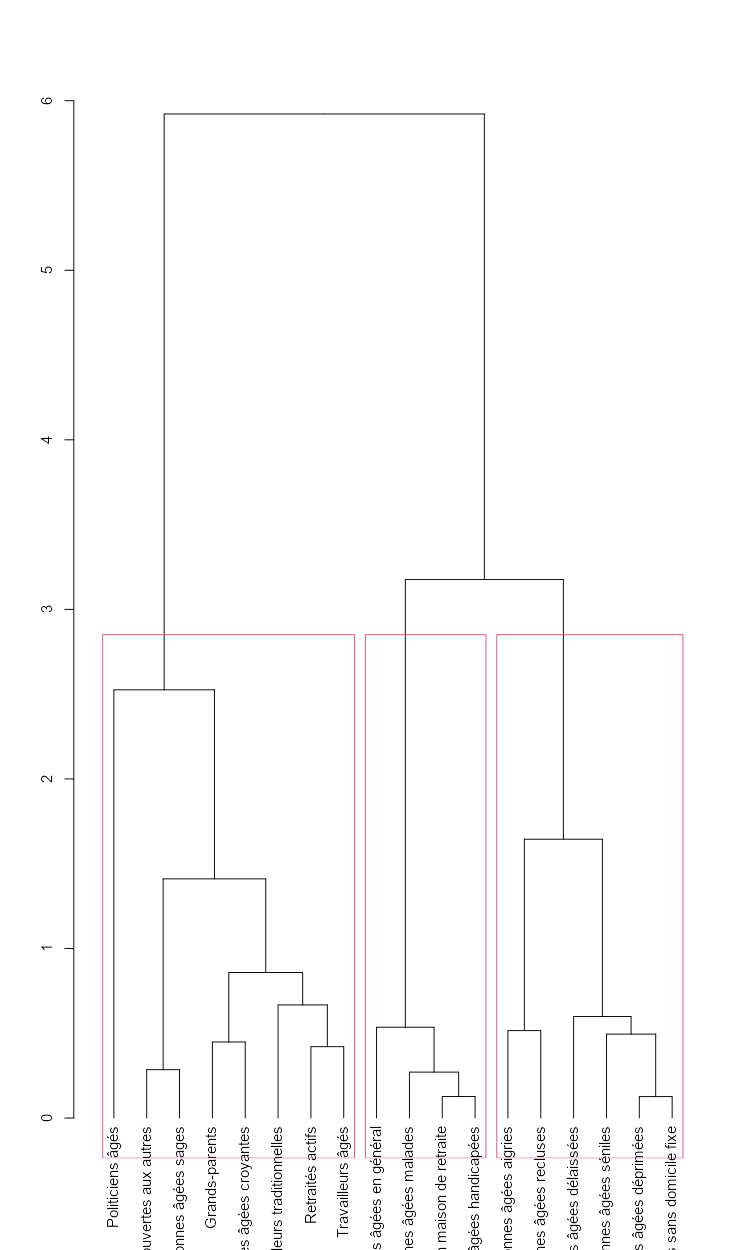


*Figure 1.*Dendrogram : 3 clusters solution


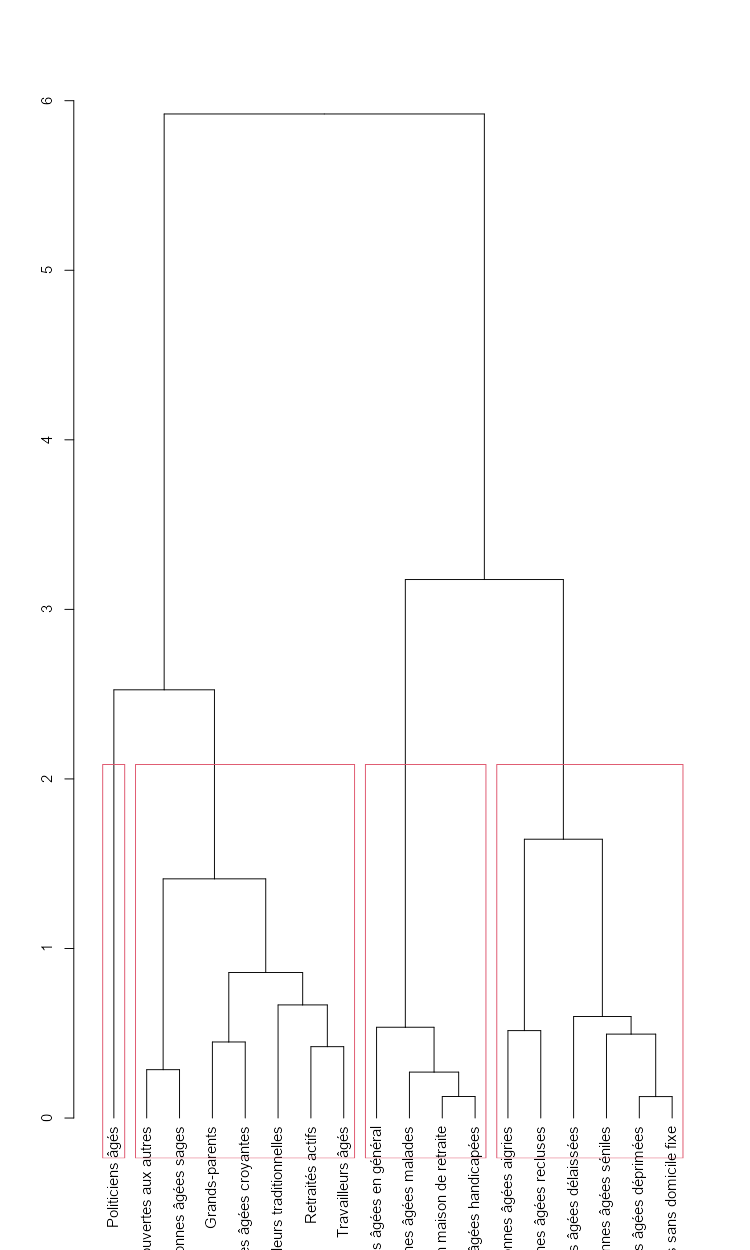


*Figure 2.* Dendrogram : 4 clusters solution


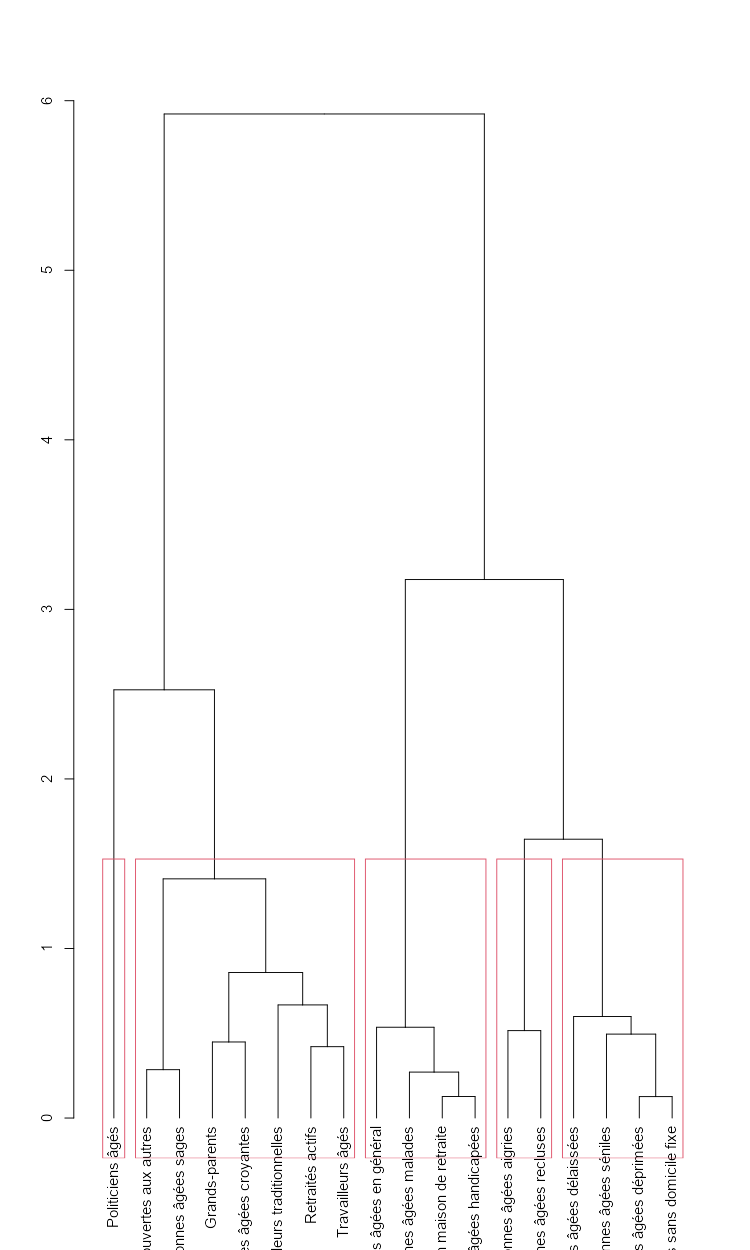


*Figure 3.* Dendrogram : 5 clusters solution

1. ***K*-means cluster analyses (with the parallel threshold method)**


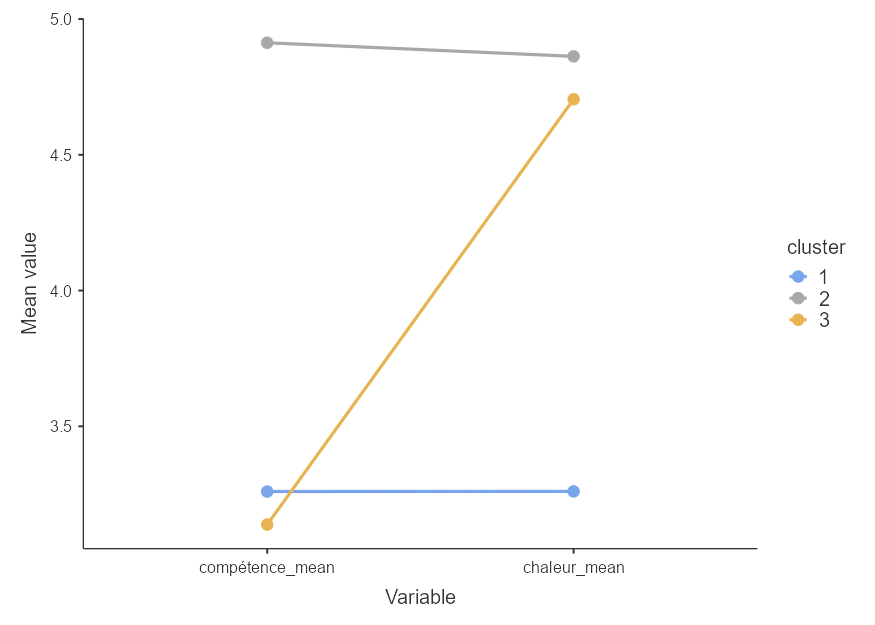


*Figure 4.*Plot of means across clusters (3 clusters solution)


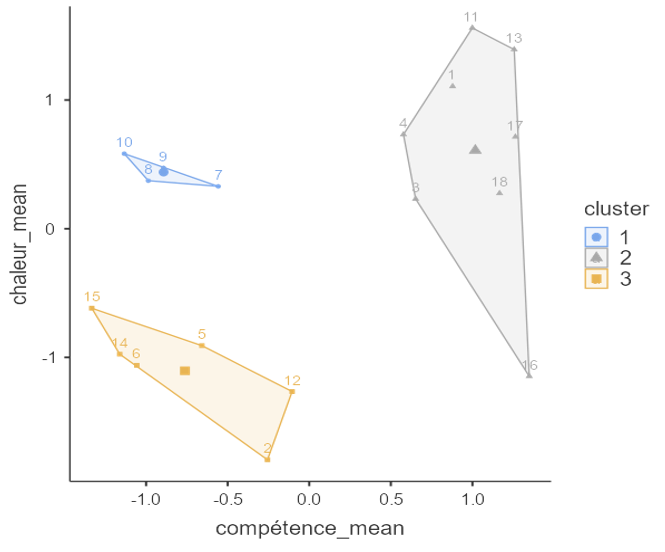


*Figure 5.*Cluster plot (3 clusters solutions)


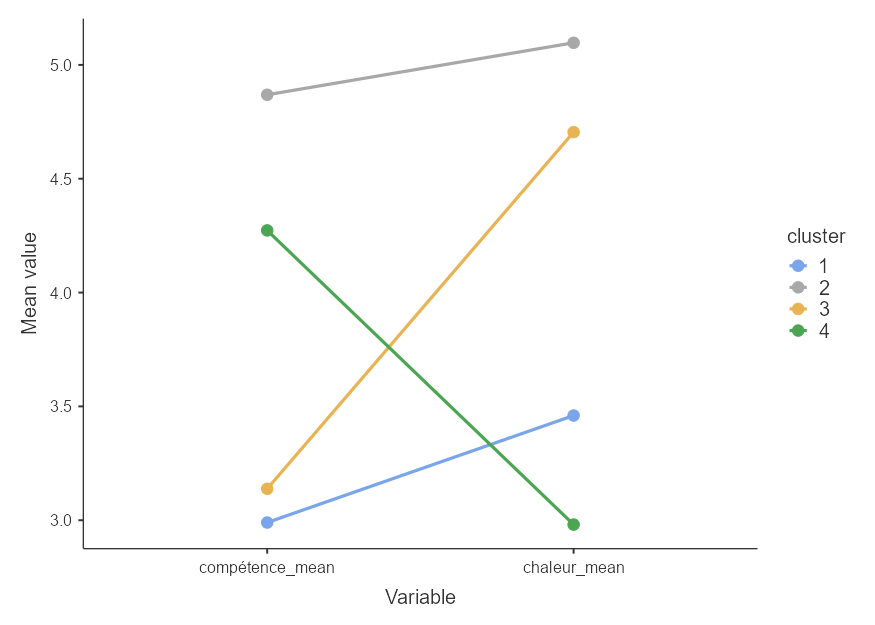


*Figure 6.*Plot of means across clusters (4 clusters solution)


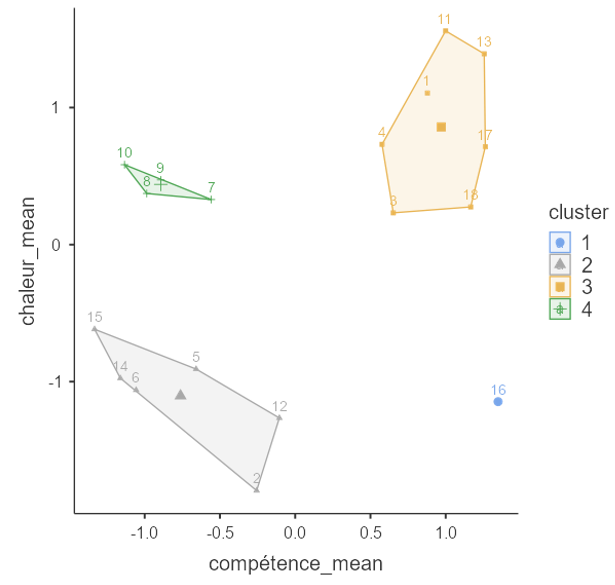


*Figure 7.*Cluster plot (4 clusters solutions)


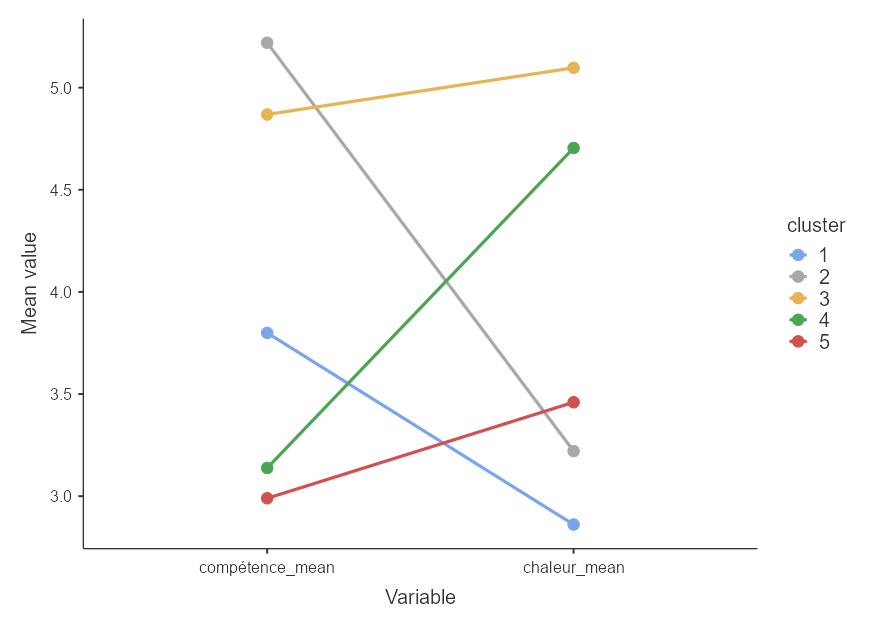


*Figure 8.*Plot of means across clusters (5 clusters solution)


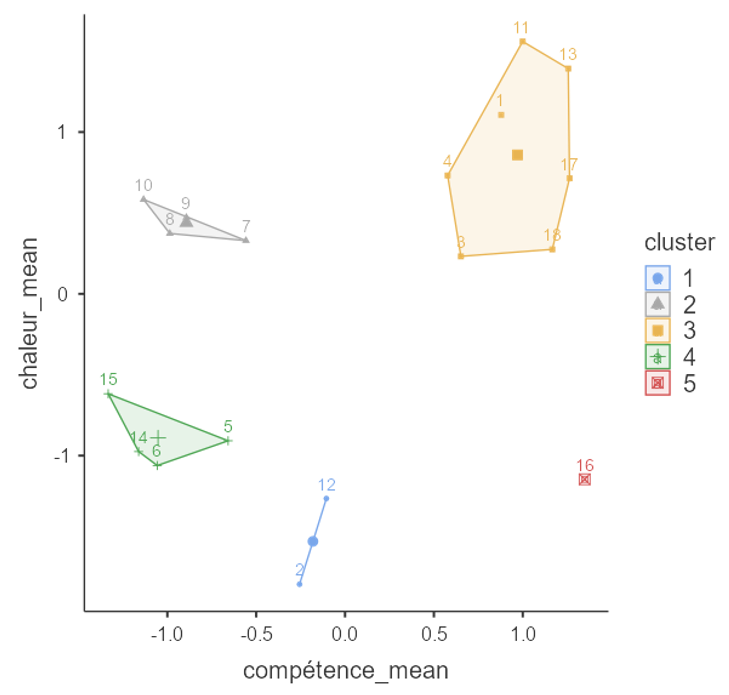


*Figure 9.*Cluster plot (5 clusters solutions)


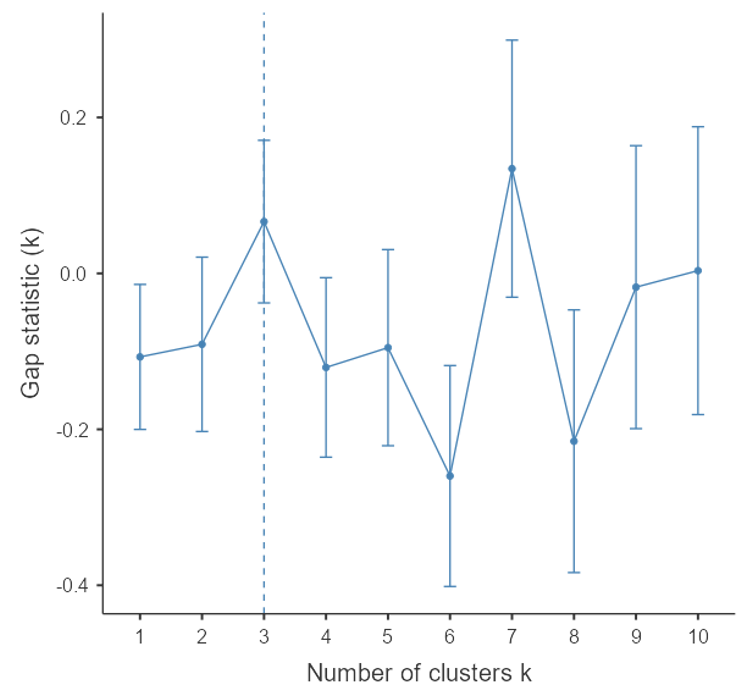


*Figure 10.*Optimal number of clusters

1. **Excluding older politician group**
2. **Hierarchical cluster analyses**


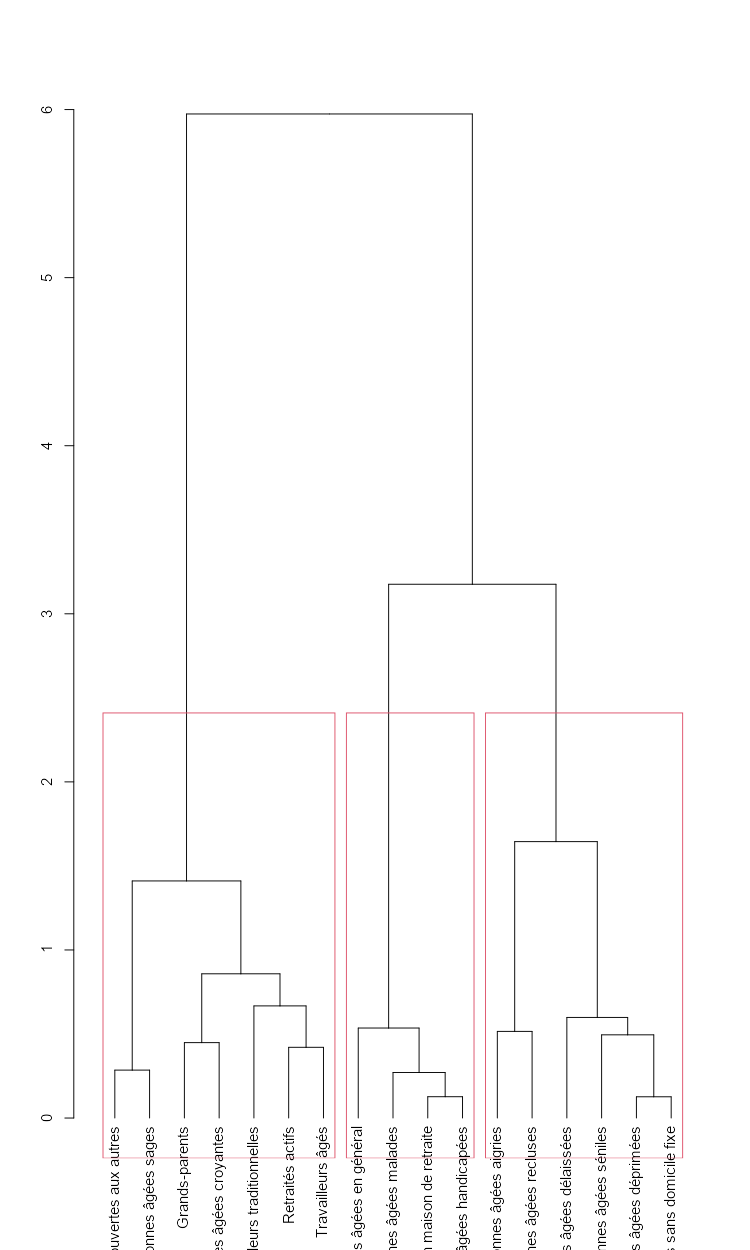


*Figure 11.*Dendrogram : 3 clusters solution

1. ***K*-means cluster analyses (with the parallel threshold method)**


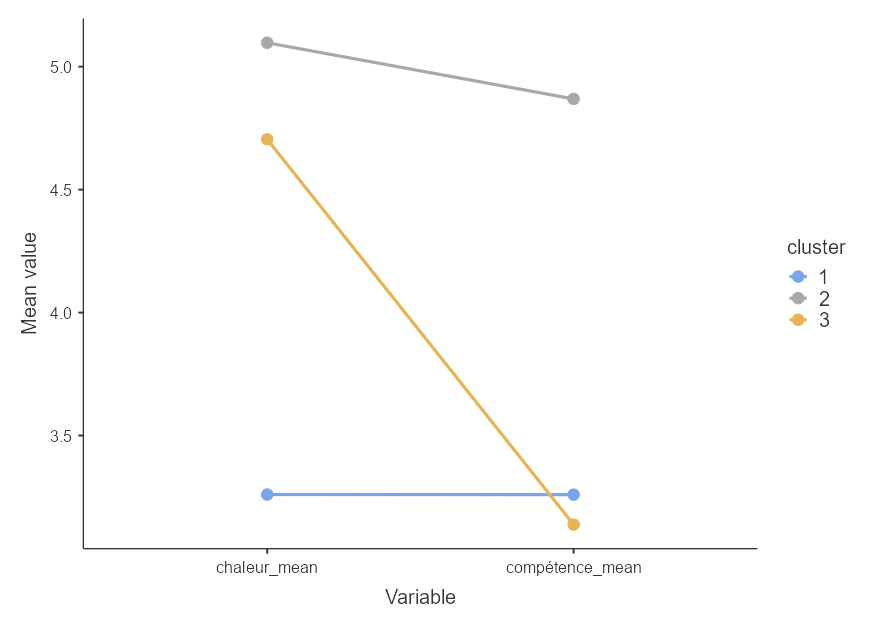


*Figure 12.*Plot of means across clusters (3 clusters solution)


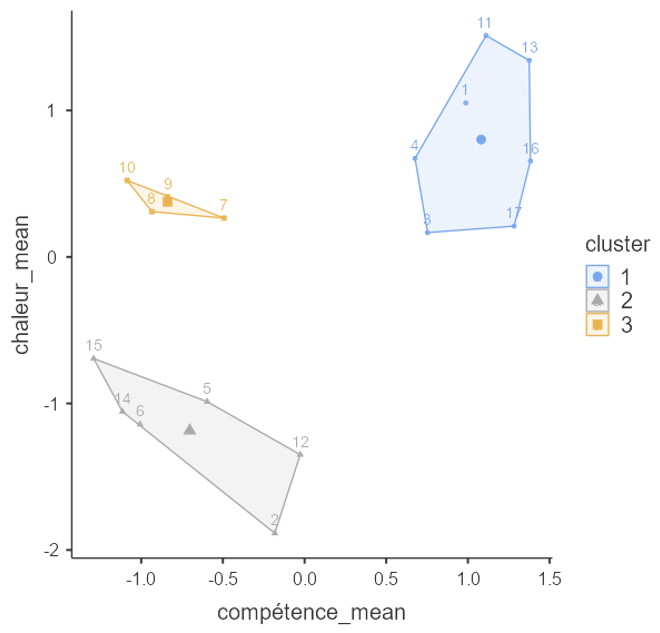


*Figure 13.*Cluster plot (3 clusters solutions)

*Figure 14.*Optimal number of clusters


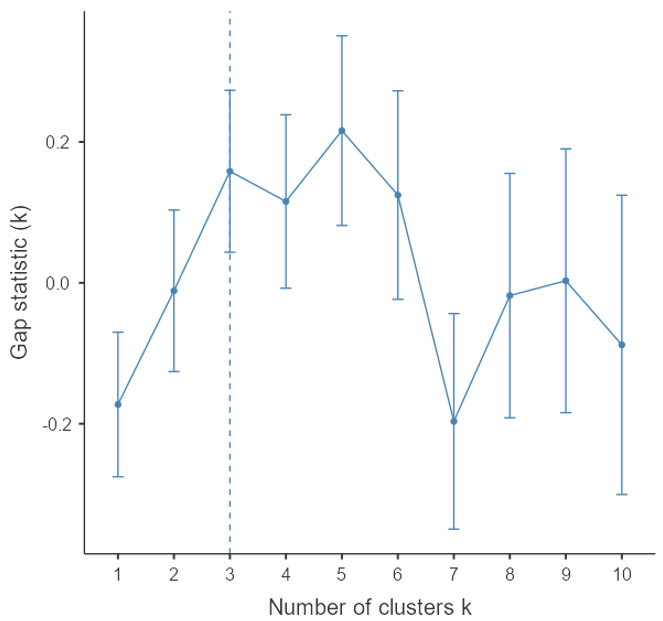


**Means and Standard Deviations**

**Table 3**

*Means and standard deviations (in parenthesis) of each construct by subtype*

| Group |  |  | Warmth |  | Competence |  | Competition |  | Status |  | Respect |
| --- | --- | --- | --- | --- | --- | --- | --- | --- | --- | --- | --- |
|  |  |  |  |  |  |  |  |  |  |  |  |
| Older people  (*n* = 74) |  |  | 4.60  (.98) |  | 3.45  (1.01) |  | 3.22  (1.53) |  | 3.72  (1.09) |  | 4.69  (.99) |
| Abandoned  (*n* = 66) |  |  | 3.44  (1.28) |  | 3.36  (1.20) |  | 3.48  (1.66) |  | 2.78  (.99) |  | 2.94  (1.39) |
| Active retiree  (*n* = 71) |  |  | 4.96  (1.11) |  | 5.14  (1.04) |  | 2.99  (1.46) |  | 4.46  (1.22) |  | 5.17  (1.34) |
| Attached to traditional values  (*n* = 72) |  |  | 4.51  (1.30) |  | 4.57  (1.05) |  | 3.28  (1.48) |  | 4.26  (1.04) |  | 4.77  (1.26) |
| Believer  (*n* = 69) |  |  | 4.98  (1.39) |  | 4.50  (1.50) |  | 3.13  (1.69) |  | 3.94  (1.25) |  | 4.51  (1.41) |
| Depressed  (*n* = 70) |  |  | 3.30  (1.21) |  | 2.99  (.93) |  | 3.58  (1.68) |  | 2.79  (.92) |  | 2.60  (1.17) |
| Disabled  (*n* = 69) |  |  | 4.74  (1.01) |  | 3.14  (1.02) |  | 3.32  (1.33) |  | 3.06  (1.03) |  | 4.01  (1.52) |
| Embittered  (*n* = 73) |  |  | 2.61  (1.24) |  | 3.73  (1.14) |  | 3.77  (1.88) |  | 3.97  (1.13) |  | 2.73  (1.33) |
| Grandparent  (*n* = 73) |  |  | 5.33  (.92) |  | 4.78  (.95) |  | 3.03  (1.28) |  | 4.19  (1.03) |  | 5.51  (1.03) |
| Homeless  (*n* = 65) |  |  | 3.38  (1.23) |  | 2.89  (1.03) |  | 3.24  (1.74) |  | 2.09  (.98) |  | 2.55  (1.64) |
| Living in retirement home  (*n* = 69) |  |  | 4.64  (1.09) |  | 3.05  (.92) |  | 2.84  (1.35) |  | 3.34  (.98) |  | 3.67  (1.34) |
| Older politician  (*n* = 75) |  |  | 3.22  (1.22) |  | 5.22  (1.09) |  | 4.67  (1.42) |  | 5.83  (.97) |  | 4.43  (1.35) |
| Older worker  (*n* = 69) |  |  | 4.55  (1.05) |  | 5.05  (.96) |  | 3.27  (1.39) |  | 3.93  (1.31) |  | 5.11  (1.16) |
| Open to others  (*n* = 72) |  |  | 5.75  (.96) |  | 4.90  (1.07) |  | 2.96  (1.31) |  | 3.89  (1.14) |  | 5.36  (1.08) |
| Recluse  (*n* = 71) |  |  | 3.11  (1.07) |  | 3.87  (1.06) |  | 2.85  (1.53) |  | 3.51  (1.17) |  | 2.81  (1.26) |
| Senile  (*n* = 72) |  |  | 3.72  (1.24) |  | 2.73  (1.11) |  | 3.69  (1.81) |  | 3.00  (1.07) |  | 3.65  (1.77) |
| Sick  (*n* = 70) |  |  | 4.84  (1.12) |  | 2.91)  (.97) |  | 2.92  (1.36) |  | 3.21  (1.12) |  | 4.14  (1.57) |
| Wise  (*n* = 69) |  |  | 5.60  (.90) |  | 5.13  (1.15) |  | 2.91  (1.81) |  | 4.41  (1.18) |  | 5.75  (1.06) |

**For any further information, please contact Valérian Boudjemadi (**[**boudjemadi@unistra.fr**](mailto:boudjemadi@unistra.fr)**)**
